# Supplementary material for: Gold supported on Ti incorporated MCM-36 as efficient catalysts in propylene epoxidation with H2and O2
Source: Royal Society of Chemistry journal article supplement (doi:10.1039/c5ra08621c), 2015-01-01
Supplement: c5ra08621c1.pdf [file c5ra08621c1.pdf]

# Gold Supported on Ti Incorporated MCM-36 as Efficient Catalysts in Propylene Epoxidation with H<sub>2</sub> and O<sub>2</sub>

*Fang Jin<sup>1,2</sup>, Tsung-Han Lin<sup>1</sup>, Chih-Cheng Chang<sup>1</sup>, Ben-Zu Wan<sup>3</sup>, Jyh-Fu Lee<sup>4</sup> and Soofin Cheng<sup>1\*</sup>*

<sup>1</sup>Department of Chemistry, National Taiwan University, Taipei 10617, Taiwan

<sup>2</sup>Key Laboratory for Green Chemical Process of Ministry of Education, School of Chemical Engineering and Pharmacy,  
Wuhan Institute of Technology, Wuhan 430073, China

<sup>3</sup>Department of Chemical Engineering, National Taiwan University, Taipei 10617, Taiwan

<sup>4</sup>Research Division, National Synchrotron Radiation Research Center, Hsinchu 300, Taiwan.

\*Email: chem1031@ntu.edu.tw

**Supporting information**

**Table S1.** Catalytic performance over different catalysts mAu/xSi/Ti-MCM-36 and mAuNH<sub>3</sub>/xSi/Ti-MCM-36.

| Catalyst                               | Si/Ti<br>atomic<br>ratio | Au<br>wt% | T<br>(K) | PO yield (%) | Propene<br>conv.(%) | Selectivity (%) |         |        |        | CO <sub>2</sub><br>select.<br>(%) | H <sub>2</sub><br>conv.<br>(%) | H <sub>2</sub><br>select.<br>(%) | PO rate<br>(g <sup>*</sup> h <sup>-1</sup><br>*kg <sub>cat</sub> <sup>-1</sup> ) | TOR<br>(g <sub>PO</sub> <sup>*</sup> h <sup>-1</sup><br>*g <sub>Au-1</sub> <sup>-1</sup> ) |      |
|----------------------------------------|--------------------------|-----------|----------|--------------|---------------------|-----------------|---------|--------|--------|-----------------------------------|--------------------------------|----------------------------------|----------------------------------------------------------------------------------|--------------------------------------------------------------------------------------------|------|
|                                        |                          |           |          |              |                     | PO              | PA      | ACR    | ACE    |                                   |                                |                                  |                                                                                  |                                                                                            |      |
| 4.5Au/100Si/Ti-MCM-36                  | 30                       | 0.84      | 453      | (0.9)        | (0.88)              | (84.93)         | (0)     | (4.55) | (0)    | (10.23)                           | (19.61)                        | (3.81)                           | (13.9)                                                                           | (1.65)                                                                                     |      |
|                                        |                          |           |          | 0.67         | 0.71                | 93.02           | 0       | 0.91   | 0      | 6.01                              | 14.46                          | 4.68                             | 10.25                                                                            | 1.22                                                                                       |      |
|                                        |                          |           |          | 433          | 0.51                | 0.55            | 94.49   | 0      | 1.14   | 0                                 | 4.3                            | 14.79                            | 3.49                                                                             | 7.91                                                                                       | 0.94 |
|                                        |                          |           |          | 473          | 0.44                | 0.55            | 79.43   | 4.97   | 3.55   | 0                                 | 11.97                          | 18.81                            | 2.35                                                                             | 6.77                                                                                       | 0.81 |
| 3Au/100Si/Ti-MCM-36                    | 30                       | 0.36      | 453      | (1.88)       | (2.98)              | (62.99)         | (1.68)  | (4.7)  | (0.34) | (30.2)                            | (43.36)                        | (4.33)                           | (28.91)                                                                          | (8.03)                                                                                     |      |
|                                        |                          |           |          | 1.01         | 1.57                | 63.08           | 0       | 14.68  | 0      | 22.25                             | 26.72                          | 4.28                             | 15.49                                                                            | 5.53                                                                                       |      |
|                                        |                          |           |          | 433          | 0.97                | 1.2             | 81.07   | 0      | 8.25   | 0                                 | 10.69                          | 28.94                            | 5.53                                                                             | 14.99                                                                                      | 5.35 |
|                                        |                          |           |          | 473          | 0.98                | 2.05            | 48.63   | 5.17   | 27.09  | 0                                 | 19.15                          | 38.09                            | 3.92                                                                             | 15.16                                                                                      | 5.42 |
| 1.5Au/100Si/Ti-MCM-36                  | 30                       | 0.19      | 453      | (1.8)        | (2.19)              | (82.24)         | (1.37)  | (0)    | (0)    | (16.29)                           | (18.51)                        | (9.73)                           | (27.74)                                                                          | (14.6)                                                                                     |      |
|                                        |                          |           |          | 1.39         | 1.61                | 86.61           | 0.23    | 0      | 0      | 13.14                             | 11.36                          | 12.78                            | 21.43                                                                            | 11.28                                                                                      |      |
|                                        |                          |           |          | 433          | 1.33                | 1.49            | 90.74   | 0.3    | 0      | 0                                 | 9.01                           | 8.98                             | 16.74                                                                            | 20.51                                                                                      | 10.8 |
|                                        |                          |           |          | 473          | 1.1                 | 1.6             | 67.45   | 2.6    | 0.92   | 0                                 | 29.06                          | 17.72                            | 6.17                                                                             | 16.93                                                                                      | 8.91 |
| 1Au/100Si/Ti-MCM-36                    | 30                       | 0.12      | 453      | (0.93)       | (1.08)              | (86.02)         | (0)     | (0)    | (0)    | (13.58)                           | (16.57)                        | (5.61)                           | (14.31)                                                                          | (11.93)                                                                                    |      |
|                                        |                          |           |          | 0.48         | 0.61                | 77.49           | 0       | 0      | 0      | 22.47                             | 12.58                          | 3.65                             | 7.42                                                                             | 6.18                                                                                       |      |
| 1.5Au/40Si/Ti-MCM-36                   | 15.3                     | 0.31      | 453      | (1.31)       | (2.12)              | (61.83)         | (5.19)  | (2.83) | (0)    | (30.19)                           | (33.78)                        | (3.88)                           | (19.41)                                                                          | (16.18)                                                                                    |      |
|                                        |                          |           |          | 0.39         | 0.65                | 62.9            | 9.18    | )      | 0      | 27.34                             | 19.18                          | 1.86                             | 5.79                                                                             | 4.82                                                                                       |      |
| 1.5Au/160Ti-MCM-36                     | 94                       | 0.14      | 453      | (0.97)       | (2.22)              | (43.58)         | (18.47) | (0)    | (0)    | (38.14)                           | (28.32)                        | (3.42)                           | (14.9)                                                                           | (4.81)                                                                                     |      |
|                                        |                          |           |          | 0.39         | 0.97                | 41.39           | 5.69    | 0      | 0      | 46.95                             | 18.43                          | 1.98                             | 6.06                                                                             | 1.95                                                                                       |      |
|                                        |                          |           |          | 433          | 0.37                | 0.84            | 57.02   | 4.62   | 0      | 0                                 | 38.42                          | 13.89                            | 2.58                                                                             | 6.01                                                                                       | 1.94 |
| 1.5Au NH <sub>3</sub> /40Si/Ti-MCM-36  | 15.3                     | 1.1       | 453      | (0.18)       | (2.31)              | (7.99)          | (87.88) | (0)    | (0)    | (4.18)                            | (16.8)                         | (1.1)                            | (3.55)                                                                           | (0.32)                                                                                     |      |
|                                        |                          |           |          | 0.29         | 1.63                | 16.81           | 68.48   | 0      | 0      | 14.29                             | 13.35                          | 2.32                             | 5.65                                                                             | 0.3                                                                                        |      |
| 1.5Au NH <sub>3</sub> /100Si Ti-MCM-36 | 30                       | 0.74      | 453      | (0.43)       | (2.32)              | (18.7)          | (79.31) | (0)    | (0)    | (1.87)                            | (10.34)                        | (4.2)                            | (7.59)                                                                           | (1.15)                                                                                     |      |
|                                        |                          |           |          | 0.36         | 2.13                | 16.82           | 80.86   | 0      | 0      | 2.34                              | 10.67                          | 3.41                             | 6.36                                                                             | 0.96                                                                                       |      |
| 1.5Au NH <sub>3</sub> /160Ti-MCM-36    | 94                       | 0.38      | 453      | (0.04)       | (0.49)              | (8.5)           | (73.47) | (0)    | (0)    | (17.69)                           | (3.45)                         | (1.21)                           | (0.8)                                                                            | (0.21)                                                                                     |      |
|                                        |                          |           |          | 0.19         | 0.59                | 31.39           | 56.48   | 0      | 0      | 12.18                             | 3.97                           | 5.26                             | 3.64                                                                             | 0.96                                                                                       |      |

Reaction condition: 0.25 g catalysts, 433~498 K, space velocity: 7000 mL min<sup>-1</sup> g<sub>cat</sub><sup>-1</sup> <sup>b</sup> PO: propylene oxide, PA: propanal, ACR: acrolein, ACE: acetone.

The catalytic performance data in the bracket is collect after 10 min reaction; the other data is from the average of 6 h reaction.

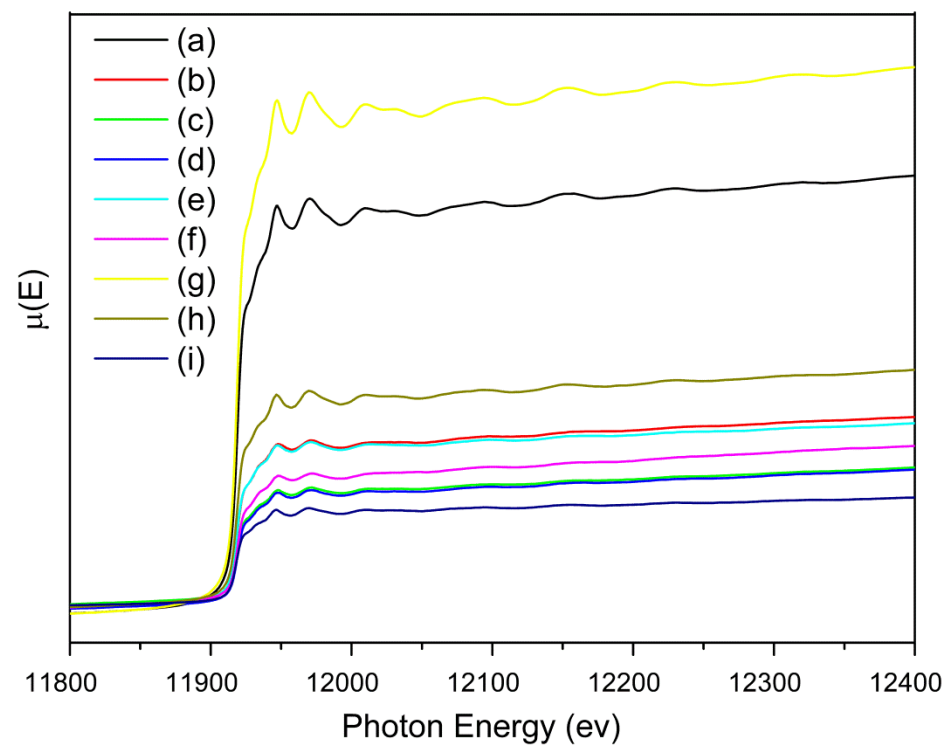

Figure S1. Au L<sub>III</sub>-edge XAFS spectra collected in the fluorescence mode of the samples (a) 4.5Au/100Si/Ti-MCM-36, (b) 3Au/100Si/Ti-MCM-36, (d) 1.5Au/100Si/Ti-MCM-36, (d) 1Au/100Si/Ti-MCM-36, (e) 1.5Au/160Si/Ti-MCM-36, (f) 1.5Au/40Si/Ti-MCM-36, (g) 1.5AuNH<sub>3</sub>/40Si/Ti-MCM-36, (h) 1.5AuNH<sub>3</sub>/100Si/Ti-MCM-36, (i) 1.5AuNH<sub>3</sub>/160Si/Ti-MCM-36.

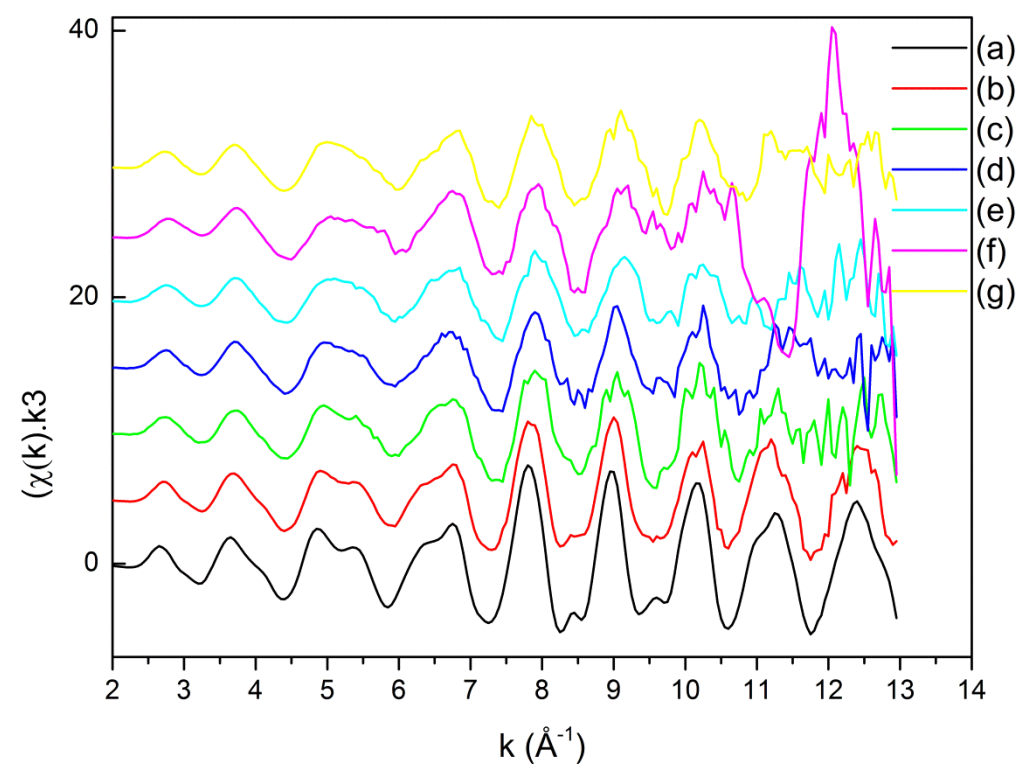

Figure S2(A). Au L<sub>III</sub>-edge k<sup>3</sup> weighted EXAFS spectra of (a) gold foil, and the samples prepared using NaOH as neutralization reagent: (b) 4.5Au/100Si/Ti-MCM-36, (c) 3Au/100Si/Ti-MCM-36, (d) 1.5Au/100Si/Ti-MCM-36, (e) 1Au/100Si/Ti-MCM-36, (f) 1.5Au/160Si/Ti-MCM-36 and (g) 1.5Au/40Si/Ti-MCM-36.

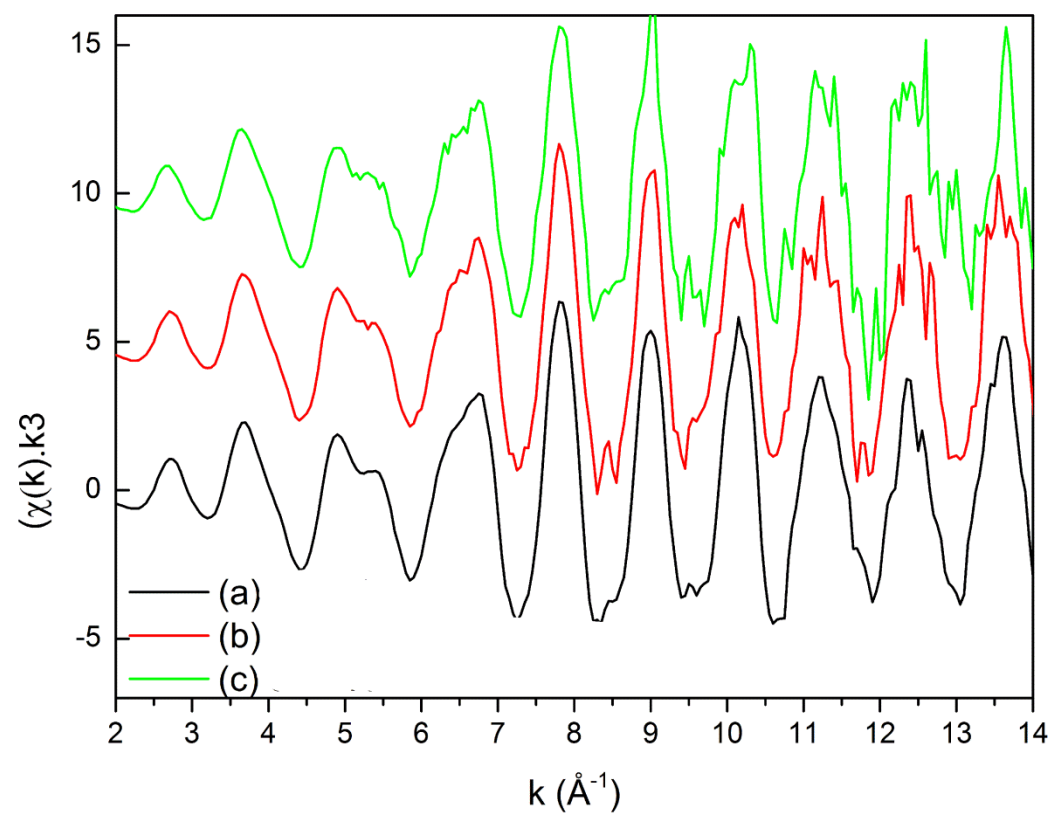

Figure S2(B). Au L<sub>III</sub>-edge k<sup>3</sup> weighted EXAFS spectra of (a) 1.5AuNH<sub>3</sub>/40Si/Ti-MCM-36, and the samples prepared using NH<sub>3</sub> as neutralization reagent: (b) 1.5AuNH<sub>3</sub>/100Si/Ti-MCM-36 and (c) 1.5AuNH<sub>3</sub>/160Si/Ti-MCM-36.

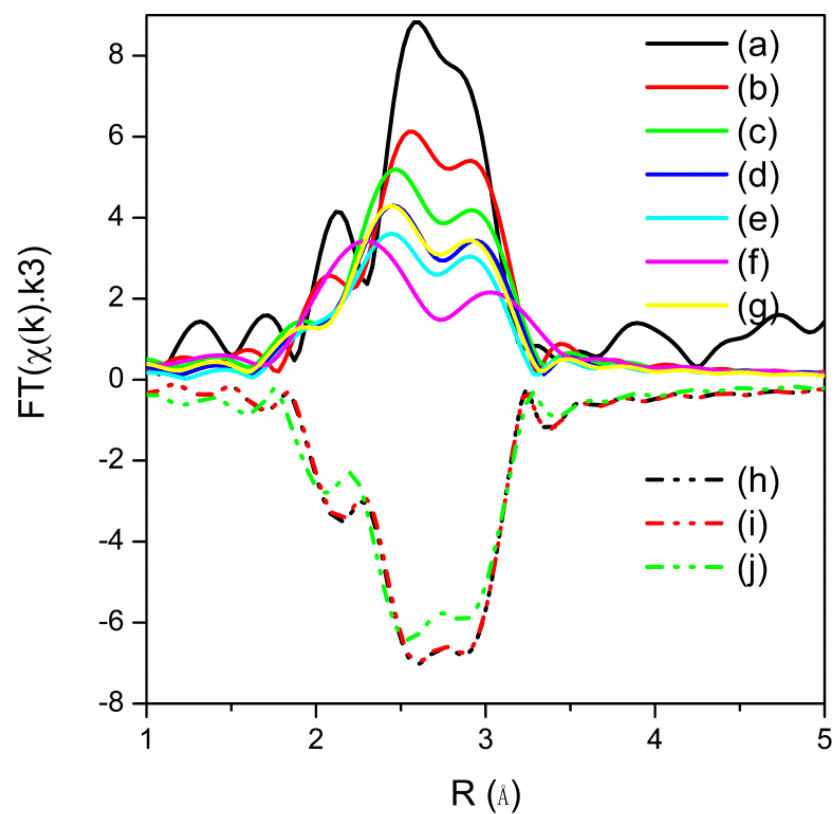

Figure S3. EXAFS of the Au  $L_{III}$ -edge curve fitting results of magnitude component of the  $\chi(k) \cdot k^3$  weighted in R space after applying a window around the first shell from 1.6~3.6 Å. (a) gold foil, (b) 4.5Au/100Si/Ti-MCM-36, (c) 3Au/100Si/Ti-MCM-36, (d) 1.5Au/100Si/Ti-MCM-36, (e) 1Au/100Si/Ti-MCM-36, (f) 1.5Au/160Si/Ti-MCM-36, (g) 1.5Au/40Si/Ti-MCM-36, (h) 1.5AuNH<sub>3</sub>/40Si/Ti-MCM-36(vertical value multiple -1), (i) 1.5AuNH<sub>3</sub>/100Si/Ti-MCM-36(vertical value multiple -1), (j) 1.5AuNH<sub>3</sub>/160Si/Ti-MCM-36(vertical value multiple -1).

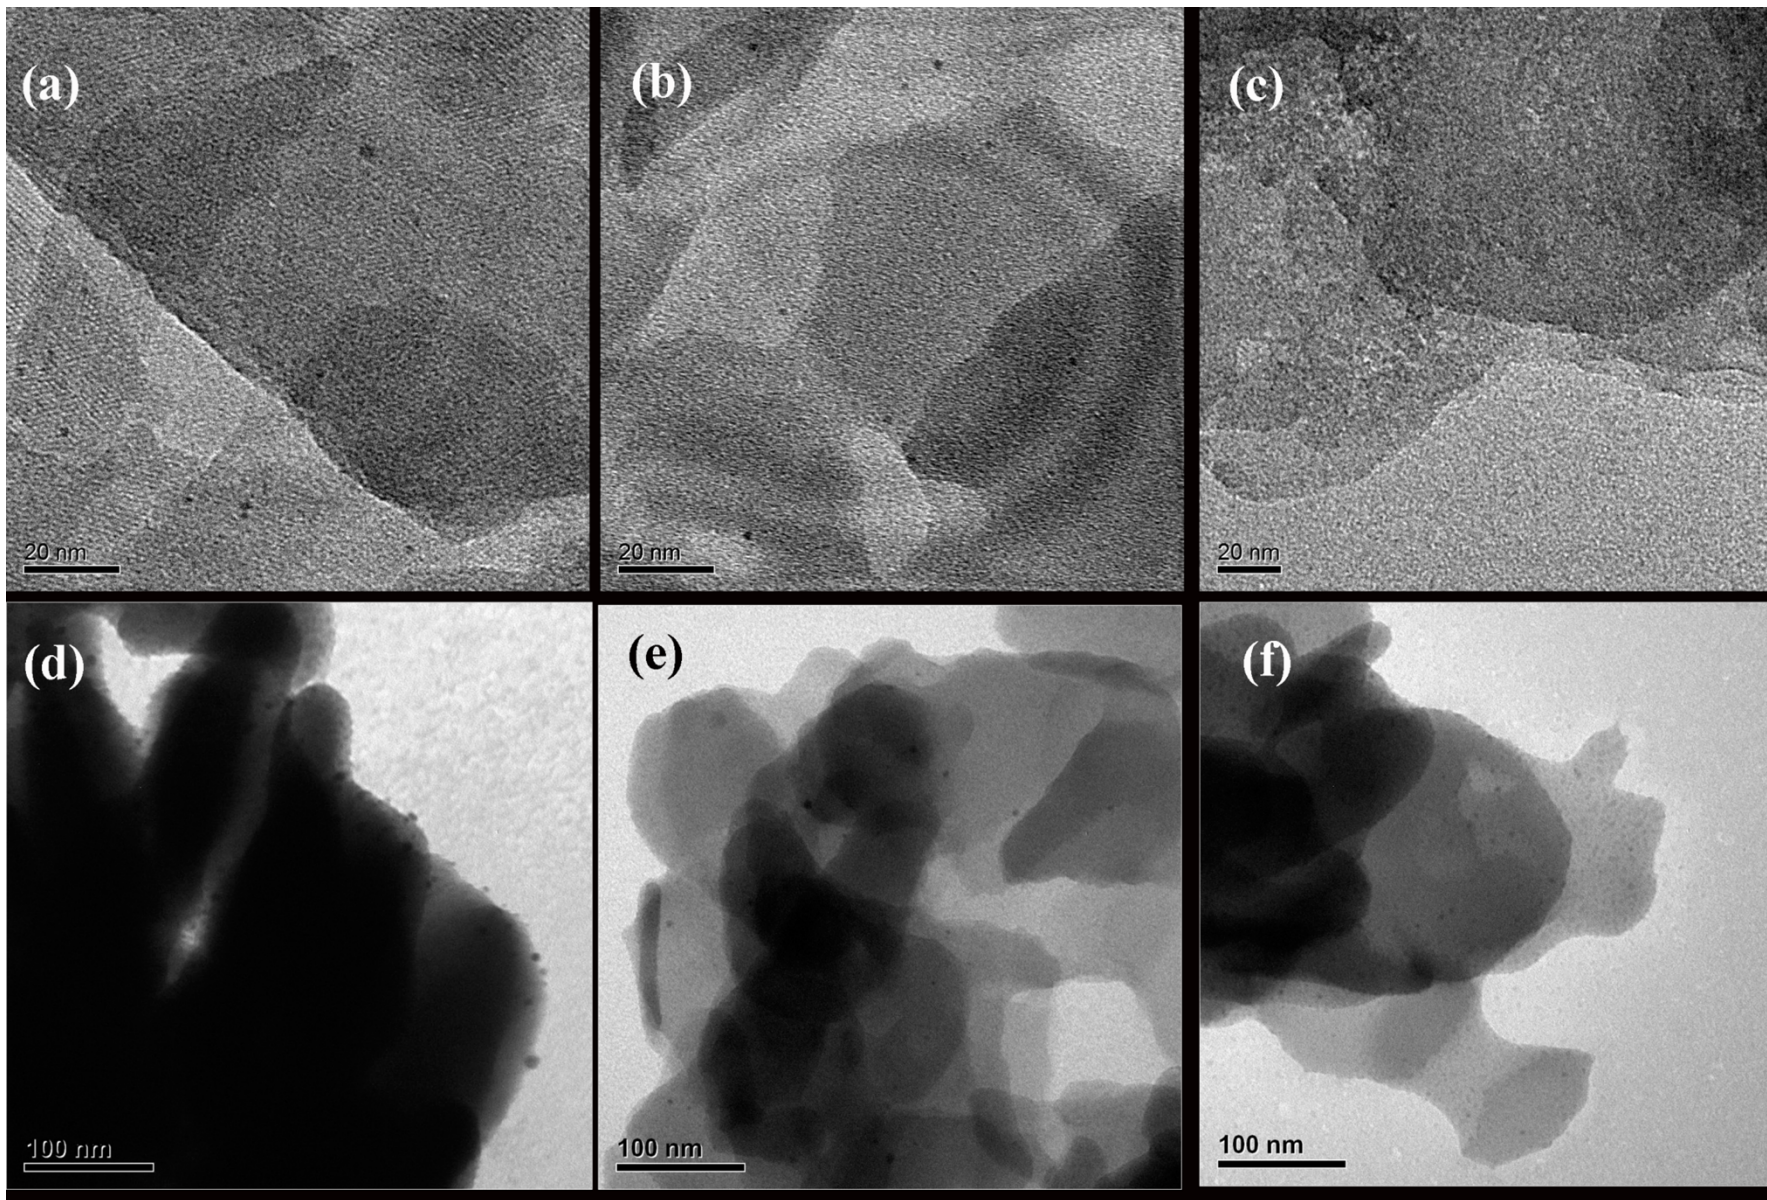

Figure. S4. TEM images of gold nanoparticles of (a) 1.5Au/40Si/Ti-MCM-36, (b) 1.5Au/100Si/Ti-MCM-36, (c) 1.5Au/160Si/Ti-MCM-36, (d) 1.5AuNH<sub>3</sub>/40Si/Ti-MCM-36, (e) 1.5AuNH<sub>3</sub>/100Si/Ti-MCM-36, (f) 1.5AuNH<sub>3</sub>/160Si/Ti-MCM-36
